# Genetic determinants of receptor-binding preference and zoonotic potential of H9N2 avian influenza viruses

Thomas P. Peacock<sup>a,b,#</sup>, Joshua E. Sealy<sup>b,c,#</sup>, William T. Harvey<sup>d,#</sup>, Donald J. Benton<sup>e</sup>, Richard Reeve<sup>d</sup>, and Munir Iqbal<sup>b\*</sup>

<sup>a</sup>Department of Infectious Diseases, Imperial College London, UK, W2 1NY

<sup>b</sup>Avian Influenza Group, The Pirbright Institute, Woking, UK, GU24 0NF

<sup>c</sup>Royal Veterinary College, University of London, UK, NW1 0TU

<sup>d</sup>Boyd Orr Centre for Population and Ecosystem Health, Institute of Biodiversity, Animal Health and Comparative Medicine, College of Medical, Veterinary and Life Sciences, University of Glasgow, UK, G12 8QQ

<sup>e</sup>The Francis Crick Institute, London, UK, NW1 1ST

#TPP, JES and WTH contributed equally to this work

\*Corresponding author: Professor Munir Iqbal, The Pirbright Institute, Pirbright, Woking, GU24 0NF, United Kingdom (E-mail. [munir.iqbal@pirbright.ac.uk](mailto:munir.iqbal@pirbright.ac.uk), tel: +44 (0)1635-577273)

## Abstract

Receptor recognition and binding is the first step of viral infection and a key determinant of host specificity. The inability of avian influenza viruses to effectively bind human-like sialylated receptors is a major impediment to their efficient transmission in humans and pandemic capacity. Influenza H9N2 viruses are endemic in poultry across Asia and parts of Africa where they occasionally infect humans and are therefore considered viruses with zoonotic potential. We previously described H9N2 viruses, including several isolated from human zoonotic cases, showing a preference for human-like receptors. Here we take a mutagenesis approach, making viruses with single or multiple substitutions in H9 haemagglutinin to determine the genetic basis of preferences for alternative avian receptors and for human-like receptors. We describe amino acid motifs at positions 190, 226 and 227 that play a major role in determining receptor specificity, and several other residues such as 159, 188, 193, 196, 198 and 225 play a smaller role. Furthermore, we show changes at residues 135, 137, 147, 157, 158, 184, 188, and 192 can also modulate virus receptor avidity and that substitutions that increased or decreased the net positive charge around the haemagglutinin receptor-binding site show increases and decreases in avidity, respectively. The motifs we identify as increasing preference for the human-receptor will help guide future H9N2 surveillance efforts and facilitate our understanding of the emergence of influenza viruses with high zoonotic potential.

## Author Summary

As of 2020, over 60 infections of humans by H9N2 influenza viruses have been recorded in countries where the virus is endemic. Avian-like cellular receptors are the primary target for these viruses. However, given that human infections have been detected on an almost monthly basis since 2015, there may be a capacity for H9N2 viruses to evolve and gain the ability to target human-like cellular receptors. Here we identify molecular signatures that can cause viruses to bind human-like receptors, and we identify the molecular basis for the distinctive preference for sulphated receptors displayed by the majority of recent H9N2 viruses. This work will help guide future surveillance by providing markers that signify the emergence of viruses with enhanced zoonotic potential as well as improving understanding the basis of influenza virus receptor-binding.

## Genetic basis of H9N2 receptor-binding variability

### 44 Introduction

45 In the 1990s avian influenza virus subtypes H5N1 and H9N2 underwent a host-switch from  
46 wild birds to domestic poultry where they have circulated ever since. H9N2 has since become one  
47 of the most widespread strains in poultry, infecting domestic fowl throughout Asia and North Africa,  
48 where it circulates hyper-endemically [1-4]. Zoonotic H9N2 cases are also occasionally detected,  
49 with human infections reported in Hong Kong, mainland China, Bangladesh, Egypt, Pakistan, Oman,  
50 Indian and Senegal; over half of human infections have been reported in the last 4 years alone, all  
51 of which indicates a growing pandemic threat from these viruses [4-12]. Although no human-to-  
52 human transmission has been recorded, some H9N2 virus strains have shown a high propensity for  
53 airborne transmission between ferrets [13, 14], the most commonly used model for human  
54 influenza transmission.

55 The influenza glycoprotein, haemagglutinin (HA), mediates attachment of virus to host cells  
56 through binding of glycans with terminal sialic acids moieties. The human upper respiratory tract  
57 (URT) is rich in glycans with terminal  $\alpha$ 2,6-linked sialic acid (SA) and is the primary site of replication  
58 for human influenza viruses. An important determinant for adaptation to the human URT is the  
59 ability of HA to bind  $\alpha$ 2,6-linked sialylated glycans [15]. However, most avian influenza viruses  
60 preferentially bind to glycans with terminal  $\alpha$ 2,3-linked SAs, which are common in the avian  
61 gastrointestinal and respiratory tracts [16]. Therefore, for avian influenza viruses to be able to  
62 efficiently infect and transmit between humans they must gain the ability to bind to  $\alpha$ 2,6-linked SA.

63 Several molecular determinants have been shown to influence the receptor-binding profile  
64 of H9N2 viruses, including position 226 (H3 HA numbering used throughout; position 216 in mature  
65 polypeptide H9 numbering) – in one strain, Q226L alone could facilitate greater replication of an  
66 H9N2 isolate in human epithelial airway cells [17]. Furthermore, substitutions at positions 155, 190  
67 and 227 (145, 180 and 217 in H9 numbering) have also been shown to play a role in receptor-binding  
68 preference in some H9N2 viruses [13, 18-20]. However, understanding of H9N2 receptor-binding  
69 preference remains piecemeal, with no studies having systematically looked at the roles of multiple  
70 residues, or residue combinations, in the variation in H9N2 receptor preference.

71 In a previous study, we tested the receptor-binding preference of several H9N2 viruses and  
72 described notable receptor preference variability amongst circulating H9N2 viruses which we  
73 hypothesised was due to amino acid variability at residues 190, 226 and 227 [21]. In this study we  
74 take three H9N2 viruses that are representative of different receptor-binding profiles, including a  
75 virus isolated from a human with a natural preference for  $\alpha$ 2,6-linked SA, and generate recombinant  
76 virus libraries with HA amino acid substitutions that represent reciprocal changes between the  
77 progenitor H9N2 viruses. We test the receptor-binding of these libraries and show residues 190,  
78 226, 227, and to a lesser extent 159, 188, 193, 196, 198, and 225, explain this receptor preference  
79 variability. We further show several antibody escape mutants have changed receptor preference or  
80 avidity, and we describe a correlation between the electrostatic charge of the HA head and receptor  
81 avidity. Finally, we use the insights from these experiments to predict that certain H9N2 lineages  
82 may have a naturally high propensity to bind human receptors and therefore possess a higher  
83 zoonotic potential within the general viral population.

### 84 Results

85 Three previously characterised viruses were chosen to act as mutagenesis backgrounds due  
86 to their distinct receptor-binding phenotypes. Receptor-binding profiles were measured using three  
87 receptor analogues: sulphated and non-sulphated 3'sialyllactosamine (3SLN(6su) and 3SLN,  
88 respectively) and 6'sialyllactosamine (6SLN). Both 3SLN(6su) and 3SLN are analogues for avian-like  
89 receptors while 6SLN is an analogue for human-like receptors. The virus A/chicken/Pakistan/UDL-

## Genetic basis of H9N2 receptor-binding variability

90 01/2008 (UDL1/08) displays high binding avidity to 3SLN(6su), but not 3SLN (avian-like), with  
91 residual binding to the human-like receptor 6SLN (Figure 1A), similar to the majority of  
92 contemporary H9N2 viruses [20-22]. The virus A/chicken/Emirates/R66/2002 (Em/R66) binds to  
93 both 3SLN(6su) and 3SLN but has no detectable binding to 6SLN (Figure 1B), similar to conventional  
94 avian-adapted H5N1 and H7 viruses [21, 23]. Finally, A/Hong Kong/33982/2009 (HK/33982) binds to  
95 all three receptor analogues, but with an appreciable preference for 6SLN, similar to early human  
96 pandemic H3N2 viruses and zoonotic H7N9 viruses (Figure 1C) [21, 24]. To test the molecular basis  
97 of these different receptor preferences, libraries of individual or multiple reciprocal mutants were  
98 generated between these viruses with a particular focus on positions 190, 226 and 227, as well as  
99 several other nearby RBS residues.

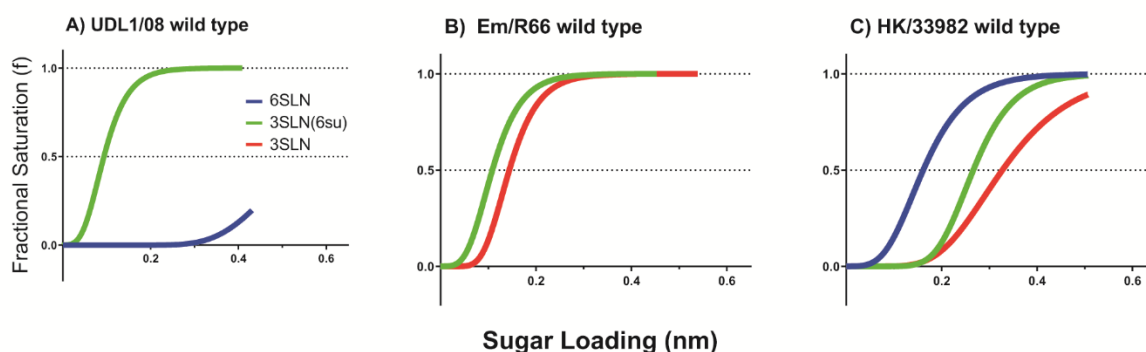

100  
101

**Figure 1 – Varying receptor binding profiles of naturally occurring viruses.** *Biolayer interferometry was used to determine the receptor binding profiles of H9N2 viruses UDL1/08 (Panel A), Em/R66 (B), and HK/33982 (C). Binding was measured to three receptor analogues representative of: 1) an avian-like receptor ( $\alpha$ 2,3-sialyllactosamine or 3SLN, red lines), 2) a sulphated avian-like receptor (Neu5Ac  $\alpha$ 2,3 Gal  $\beta$ 1-4(6-HSO3)GlcNAc or 3SLN(6su), green lines), and 3) a human-like receptor ( $\alpha$ 2,6-sialyllactosamine or 6SLN, blue lines). Where no binding was observed, the lines are omitted.*

108  
109

### *Molecular basis of preference for sulphated and non-sulphated avian receptors*

We previously showed that contemporary H9N2 viruses generally have a strong preference for sulphated avian-like receptors, a property not shared with non-H9N2 avian influenza viruses. To explore the molecular basis of this preference, we investigated amino acid differences between UDL1/08 and Em/R66, which do and do not show this preference respectively. Generally, these viruses had few differences near the RBS, though they did differ at positions 190, 226, and 227. Mutants were tested with individual reciprocal substitutions at positions 190, 226, and 227 and combinations thereof.

116 Substituting all three variable RBS residues (190/226/227) led to an approximate switch of  
117 the receptor-binding phenotypes between the two viruses. Substituting these three residues  
118 increased UDL1/08 3SLN binding and eliminated its 6SLN binding and abolished Em/R66's 3SLN  
119 binding while increasing its 6SLN binding (Figure 2, purple lines). In general, 190/226 reciprocal  
120 mutants expressed similar binding phenotypes to the triple mutants (Figure 2, brown lines),  
121 suggesting the L227I and I227L substitutions had only a modest influence on receptor-binding. The  
122 exception to this was that Em/R66 E190A/Q226L/L227I did not show the increased binding to 6SLN  
123 observed with Em/R66 E190A/Q226L (Figure 1E). However, in both cases the exact binding avidities  
124 to the three receptor analogues were not completely recapitulated; both triple mutants (UDL1/08  
125 A190E/L226Q/I227L and Em/R66 E190A/Q226L/L227I) had reduced avidity compared to their wild-  
126 type parental viruses indicating that further substitutions are required to fully recover the receptor-  
127 binding profile of the donor viruses. Nonetheless, positions 190, 226, and to a lesser extent, 227

## Genetic basis of H9N2 receptor-binding variability

128 appeared to be the primary determinants of variation in receptor-binding preference phenotypes  
 129 of UDL1/08 and Em/R66s (Table 1).

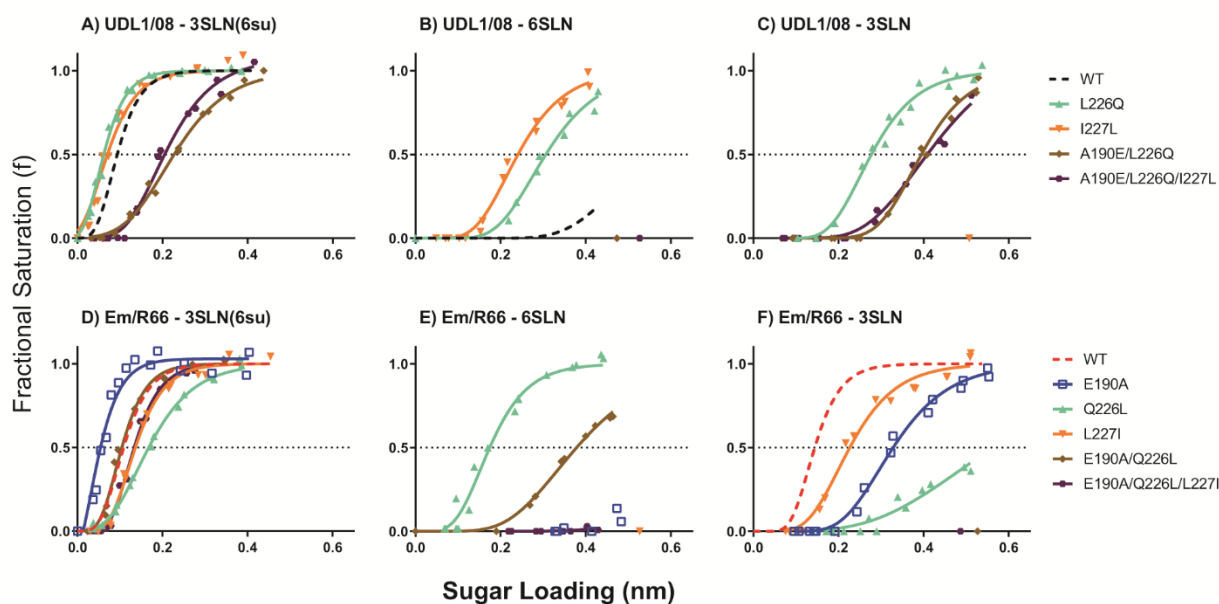

130  
 131 **Figure 2 - Receptor binding profiles of reciprocal UDL1/08-Em/R66 mutants.** Biolayer  
 132 interferometry was used to determine the receptor binding profiles mutant UDL1/08 (Panels A-C,  
 133 UDL1/08 A190E could not be rescued) and Em/R66 viruses (panels D-F). Binding was measured to 3  
 134 receptor analogues: Neu5Ac  $\alpha$ 2,3 Gal  $\beta$ 1-4(6-HSO3)GlcNAc (3SLN(6su), Panels A,D),  $\alpha$ 2,6-  
 135 sialyllactosamine (6SLN, Panels B,E) and  $\alpha$ 2,3-sialyllactosamine (3SLN, Panels C,F). Dashed black  
 136 and red lines show wild-type UDL1/08 and Em/R66 binding, respectively.

137 Further investigating the contribution of individual RBS residues, position 190 exerted a  
 138 strong influence on the preference for sulphated or non-sulphated avian-like receptors; viruses with  
 139 A190 showed increased binding to 3SLN(6su) and decreased binding to non-sulphated 3SLN  
 140 analogues while those with E190 showed the opposite (Figure 2A,C,D,F). This is potentially due to a  
 141 charge repulsion between the negatively charged side-chain of glutamate and the sulphate group  
 142 of sulphated-3SLN. Additionally, viruses containing A190 generally retained or had enhanced  
 143 human-like 6SLN binding as seen in UDL1/08 wild-type and the mutants Em/R66 E190A and Em/R66  
 144 E190A/Q226L (Figure 2B,E). This was also exemplified in the differences in binding between  
 145 UDL1/08 mutants: A190E/L226Q led to a loss of 6SLN binding while L226Q alone did not (Figure 1B  
 146 – mint and brown lines).

| Residue (H3 no) | Residue (H9 no) | WT Virus | Substitution     | Receptor  |      |
|-----------------|-----------------|----------|------------------|-----------|------|
|                 |                 |          |                  | 3SLN(6su) | 3SLN |
| 190             | 180             | UDL1/08  | A->E             | DNR       | DNR  |
|                 |                 | Em/R66   | E->A             | ++        | --   |
| 190/226         | 180/216         | UDL1/08  | A->E, L->Q       | --        | +    |
|                 |                 | Em/R66   | E->A, Q->L       | =         | ---  |
| 190/226/227     | 180/216/217     | UDL1/08  | A->E, L->Q, I->L | --        | +    |
|                 |                 | Em/R66   | E->A, Q->L, L->I | -         | ---  |

147 **Table 1. Haemagglutinin amino acid differences modulating preference for sulphated and non-sulphated avian**  
 148 **receptor.** '=' indicates <2 fold difference, '+/-' indicates 2-10 fold increase/decrease, '++/- -' indicates 10-100-fold  
 149 increase/decrease, '+++/- - -' indicates >100-fold increase/decrease in binding relative to the wild type virus. 'null'  
 150 indicates no difference was able to be seen because no binding to this analogue was detected with or without the  
 151 substitution. 'DNR' indicates the virus was unable to be rescued. '/' indicates a mutant was not made in that virus  
 152 background.

## Genetic basis of H9N2 receptor-binding variability

153 At position 226, we determined that substitutions were exerting an effect on receptor-  
154 binding avidity, consistent with the results of our previous work with red blood cell based avidity  
155 assays [25]. Viruses with Q226 bound with higher avidity, compared with L226, to each of the three  
156 analogues tested (Figure 2A-F). Additionally, Q226 favoured 3SLN binding as can be seen by the  
157 mutant UDL1/08 L226Q and the difference in avidity between Em/R66 E190A/Q226L and E190A  
158 alone (Figure 2C,F – blue and brown lines). In the background of Em/R66, Q226L showed a large  
159 increase in 6SLN binding (Figure 2E – mint line), however a matching reduction in 6SLN binding by  
160 UDL1/08 L226Q was not seen (Figure 2B), indicating this is probably dependent on the context of  
161 the other amino acids in the H9 HA RBS as we had previously predicted [21].

162 Finally, substitutions at position 227 were identified as playing a minor role in modulation of  
163 avidity, though did not change receptor preference or regulate complete gain or loss of binding to  
164 any analogue. Relative to the associated parental virus, UDL1/08 I227L showed higher avidity to all  
165 receptors while Em/R66 L227I showed lower avidity (Figure 2, orange lines), consistent with  
166 previous inferences made from indirect measurements of avidity [25].

### 167 *Molecular basis of preference for the human receptor*

168 To investigate the molecular basis of human-like receptor-binding as seen in some H9N2  
169 viruses, a further reciprocal library was generated between UDL1/08 and HK/33982, a virus isolated  
170 from a human case of H9N2. UDL1/08 naturally binds to sulphated 3SLN with slight binding to 6SLN,  
171 while HK/33982 binds strongly to the human-like receptor 6SLN with moderate binding to both  
172 sulphated and non-sulphated 3SLN (Figure 1A, C). The amino acids at the three residues shown  
173 above to largely determine preference for sulphated vs non-sulphated (190, 226, and 227) also vary  
174 between these two viruses. In addition to these three positions, reciprocal mutations were  
175 introduced at positions 188 and 193 (178 and 183 in H9 numbering) on the basis that these residues  
176 are located next to the binding site and vary between UDL1/08 and HK/33982.

177 Introducing reciprocal mutations at the three residues (190/226/227) shown above to  
178 modulate preference for the sulphated vs non-sulphated avian receptor also influenced receptor  
179 preference in this case. Introducing the substitutions A190D, L226Q and I227Q from HK/33982 into  
180 UDL1/08 led to a loss of most of its 3SLN(6su) binding and a slight gain in 6SLN binding (Figure 2A,  
181 B, purple lines), however this binding phenotype did not resemble that of HK/33982. This suggests  
182 additional substitutions are required for a full gain of the human-adapted receptor-binding profile.  
183 The reciprocal triple mutant was unable to be recovered in the HK/33982 background, indicating  
184 additional residues must play a role in stabilising residues 190, 226 and 227 between these two  
185 viruses (Table S1).

186 Introduction of reciprocal substitutions at residues 190 and 227 together indicated that  
187 these positions likely play an important role in modulation of preference between the sulphated  
188 avian and human-like receptors. UDL1/08 with A190D/I227Q showed slightly decreased binding to  
189 3SLN(6su) and appreciably increased 6SLN binding (Figure 3A,B – grey lines). HK/33982  
190 D190A/Q227I had reduced receptor-binding to 6SLN and increased binding to sulphated 3SLN,  
191 creating an approximation of the receptor-binding preference of wild-type UDL1/08 (Figure 3D,E –  
192 grey lines). From this mutant library it is clear that switches at position 226 create an incompatibility  
193 in both virus backgrounds, with several viruses losing nearly all receptor-binding (UDL1/08  
194 A190D/L226Q and UDL1/08 A190D/L226Q/I227Q) or infectious virus unable to be rescued entirely  
195 (HK/33982 D190A/Q226L and HK/33982 D190A/Q226L/Q227I) (Table S1).

## Genetic basis of H9N2 receptor-binding variability

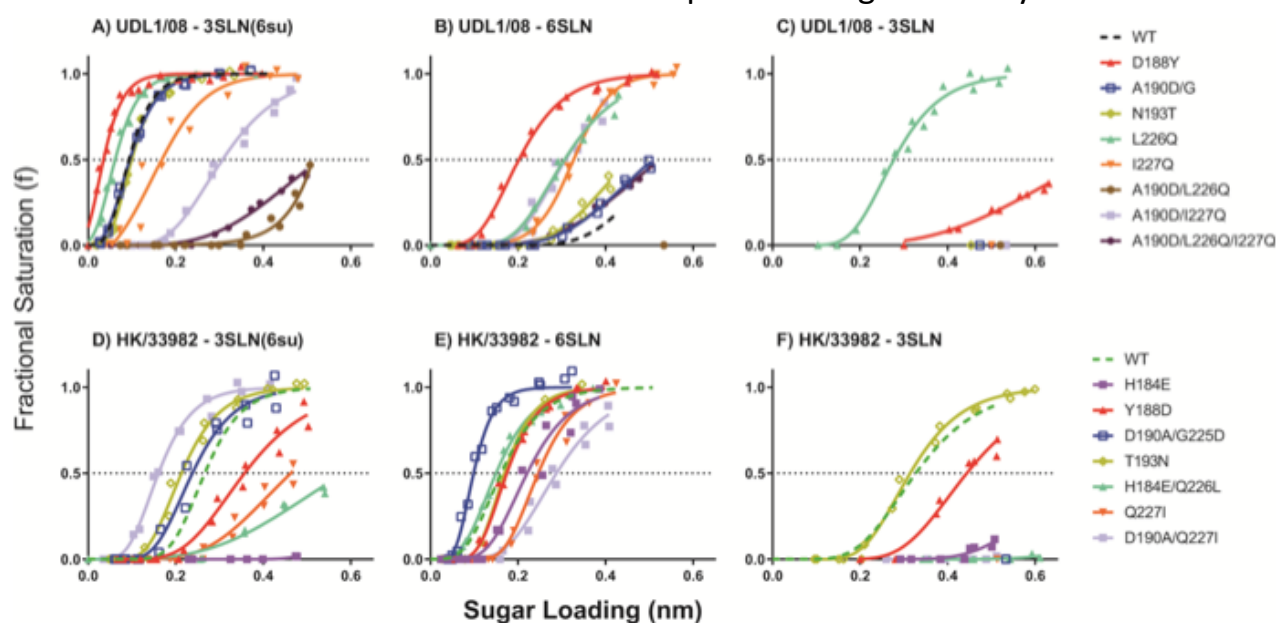

196

197

198 **Figure 3. Receptor binding profiles of reciprocal UDL1/08-HK/33982 mutants** *Biolayer*  
 199 *interferometry was used to determine the receptor binding profiles mutant UDL1/08 (Panels A-C)*  
 200 *and HK/33982 viruses (panels D-F). Binding was measured to 3 receptor analogues: Neu5Ac  $\alpha$ 2,3*  
 201 *Gal  $\beta$ 1-4(6-HSO3)GlcNAc (3SLN(6su), Panels A,D),  $\alpha$ 2,6-sialyllactosamine (6SLN, Panels B,E) and*  
 202  *$\alpha$ 2,3-sialyllactosamine (3SLN, Panels C,F). Dashed black and green lines show wild-type UDL1/08*  
*and HK/33982 binding, respectively.*

203

204 The effects of single amino acid substitutions made between UDL1/08 and HK/33982 were  
 205 also evaluated. Amino acid substitutions at residue 190 in the single reciprocal mutants of UDL1/08  
 206 and HK/33982 showed potential incompatibilities. UDL1/08 A190D showed a mixed population also  
 207 including D190G while HK/33982 D190A gained the additional substitution G225D, as previously  
 208 described [25]; HK/33982 with the G225D substitution alone was also unable to produce infectious  
 209 virus (Table S1). It is, therefore, hard to draw conclusions from these viruses upon the influence of  
 210 these mutations in isolation. HK/33982 D190A/G225D did appear to increase 6SLN binding and  
 211 3SLN(6su) binding while decreasing 3SLN binding (similar to Em/R66 E190A) (Figure 3D-F – blue  
 212 lines), UDL1/08 A190D/G showed no difference in binding compared to wild-type UDL1/08 (Figure  
 213 2A-C – blue lines), however it is difficult to interpret these data, given the mixed population.

213

214

215

216

217

218

219

220

221

## Genetic basis of H9N2 receptor-binding variability

| Residue (H3 no) | Residue (H9 no) | WT Virus | Substitution     | Avian receptor |      | Human-like receptor |
|-----------------|-----------------|----------|------------------|----------------|------|---------------------|
|                 |                 |          |                  | 3SLN(6su)      | 3SLN | 6SLN                |
| 193             | 183             | UDL1/08  | N->T             | =              | null | +                   |
|                 |                 | HK/33982 | T->N             | +              | =    | =                   |
| 196             | 186             | UDL1/08  | T->K             | --             | null | ++                  |
| 198             | 188             | UDL1/08  | T->A             | --             | null | +                   |
| 226             | 216             | Em/R66   | Q->L             | -              | ---  | +++                 |
| 227             | 217             | UDL1/08  | I->M             | =              | null | ++                  |
|                 |                 | UDL1/08  | I->Q             | =              | null | ++                  |
|                 |                 | HK/33982 | Q->I             | --             | ---  | -                   |
| 190/227         | 180/217         | UDL1/08  | A->D, I->Q       | ---            | null | ++                  |
|                 |                 | HK/33982 | D->A, Q->I       | ++             | --   | --                  |
| 190/226/227     | 180/216/217     | UDL1/08  | A->D, L->Q, I->Q | ---            | null | =                   |
|                 |                 | HK/33982 | D->A, Q->L, Q->I | DNR            | DNR  | DNR                 |

222 **Table 2. Haemagglutinin amino acid differences modulating preference for avian and human-like receptors.** <sup>a</sup> '='  
 223 indicates <2 fold difference, '+/-' indicates 2-10 fold increase/decrease, '++/-' indicates 10-100-fold increase/decrease,  
 224 '+++/- - -' indicates >100-fold increase/decrease in binding relative to the wild type virus. 'null' indicates no difference  
 225 was able to be seen because no binding to this analogue was detected with or without the substitution. 'DNR' indicates  
 226 the virus was unable to be rescued. '/' indicates a mutant was not made in that virus background.

227 Similar to the reciprocal mutants of UDL1/08 and Em/R66, amino acid substitutions at  
 228 residue 226 between UDL1/08 and HK/33982 displayed a clear avidity effect, with viruses possessing  
 229 226L appearing to show higher avidity compared with 226Q. HK/33982 with Q226L gained the  
 230 additional compensatory substitution H184E (Table S1); HK/33982 with H184E alone showed a large  
 231 reduction in avidity to all receptor analogues, whereas HK/33982 with H184E/Q226L increased  
 232 avidity to both 6SLN and 3SLN(6su) relative to H184E alone, suggesting Q226L increased binding  
 233 avidity (Figure 3D-F – purple and mint lines). The mutant HK/33982 H184E/Q226L also showed a  
 234 strong preference for 6SLN.

235 At position 227, the introduction of I227Q in the UDL1/08 background resulted in a large  
 236 increase in 6SLN binding, a drop in binding to UDL1/08's preferred receptor 3SLN(6su), and did not  
 237 alter binding to 3SLN (Figure 3A-C, orange lines). The reciprocal substitution, HK/33982 Q227I,  
 238 showed a general avidity effect with lower binding to all analogues (Figure 3D-F – orange line),  
 239 however when introduced alongside D190A, the impact of Q227I in the HK/33982 D190A/Q227I  
 240 double mutant facilitated reduced 6SLN binding but slightly increased 3SLN(6su), relative to the  
 241 parental wild-type and the D190A(+G225D) mutant (Figure 3D-F – grey and orange lines).

242 Reciprocal substitutions at position 188 were found to influence receptor-binding while  
 243 those at position 193 were not. These residues have not previously been described as affecting  
 244 receptor-binding in H9 HA, though they are at the edge of the RBS and 193 has been described as  
 245 playing a vital role in the modulation of binding of sulphated 3SLN by H5 and H7 HA [26, 27]. Viruses  
 246 with Y188 showed higher avidity relative to viruses with D188, regardless of the virus background  
 247 (Figure 3 – red lines). Additionally, HK/33982 Y188D appeared to have minor effects on specific  
 248 receptor analogue preference; this substitution reduced binding for the 3SLN analogues to a greater  
 249 extent than the 6SLN analogue. Amino acid swaps at position 193 showed a very minor, non-  
 250 reciprocal receptor preference effect (Figure 3), consistent with our previous estimates that swaps  
 251 of residue 193 between UDL1/08 and HK/33982 would only have a minimal receptor avidity effect  
 252 [25].

## Genetic basis of H9N2 receptor-binding variability

253 *Molecular basis of variation in receptor-binding avidity*

254 In addition to showing preference for different receptors, influenza viruses vary in receptor-  
255 binding avidity. In several previous studies we have inferred that escape mutants with the largest  
256 impact of polyclonal antisera binding may be driven by avidity effects [20, 25, 28]. To further  
257 investigate the genetic basis of variation in receptor-binding avidity we constructed a library of  
258 mutants in the UDL1/08 background and assessed their receptor-binding phenotypes. To  
259 complement this, we analysed a large dataset of haemagglutination inhibition (HI) titres and HA  
260 sequences from natural H9N2 viruses to identify amino acid variants correlating with avidity effects  
261 apparent in the measured HI titres.

262 Testing of UDL1/08 mutants showed several to exhibit a general decrease in avidity to the  
263 tested analogues including K137I, F147L, K157T, N158D, N193D, and G225D (Figure 4A,B). Only a  
264 single substitution, T189N, showed a negligible effect on receptor-binding (Figure 4C,D - mint lines).  
265 Two substitutions, T135K and T192R, appeared to facilitate a general increase in avidity (i.e.  
266 increased binding to all receptor analogues tested) in a similar manner to UDL1/08 I227L and D188Y  
267 from the reciprocal mutant libraries (Figure 4C,D, 2A-C and 3A-C). R82G showed a reduction in  
268 3SLN(6su) binding while not having an effect on 6SLN binding (Figure 4E,F – blue lines). Finally, one  
269 group of mutants showed changes in receptor-binding preference with increases in ‘human-like’  
270 6SLN binding relative to ‘avian-like’ 3SLN(6su): I227M showed a large increase in 6SLN binding  
271 without changing sulphated 3SLN binding (orange lines); G159K showed a modest increase in avidity  
272 to sulphated 3SLN but a much larger relative increase in 6SLN binding (purple lines); T196I, T196K,  
273 and T198A all decreased sulphated 3SLN binding while increasing 6SLN binding to varying degrees  
274 (Figure 4E,F – light red, dark red and light brown lines). This last group of mutations represent single  
275 amino acid changes that could act as markers for viruses with greater zoonotic potential, along with  
276 the previously described Q226L (in the background of Em/R66 and HK/33982), and I227Q in a  
277 UDL1/08-like background (Figure 2E, 3B,E).



## Genetic basis of H9N2 receptor-binding variability

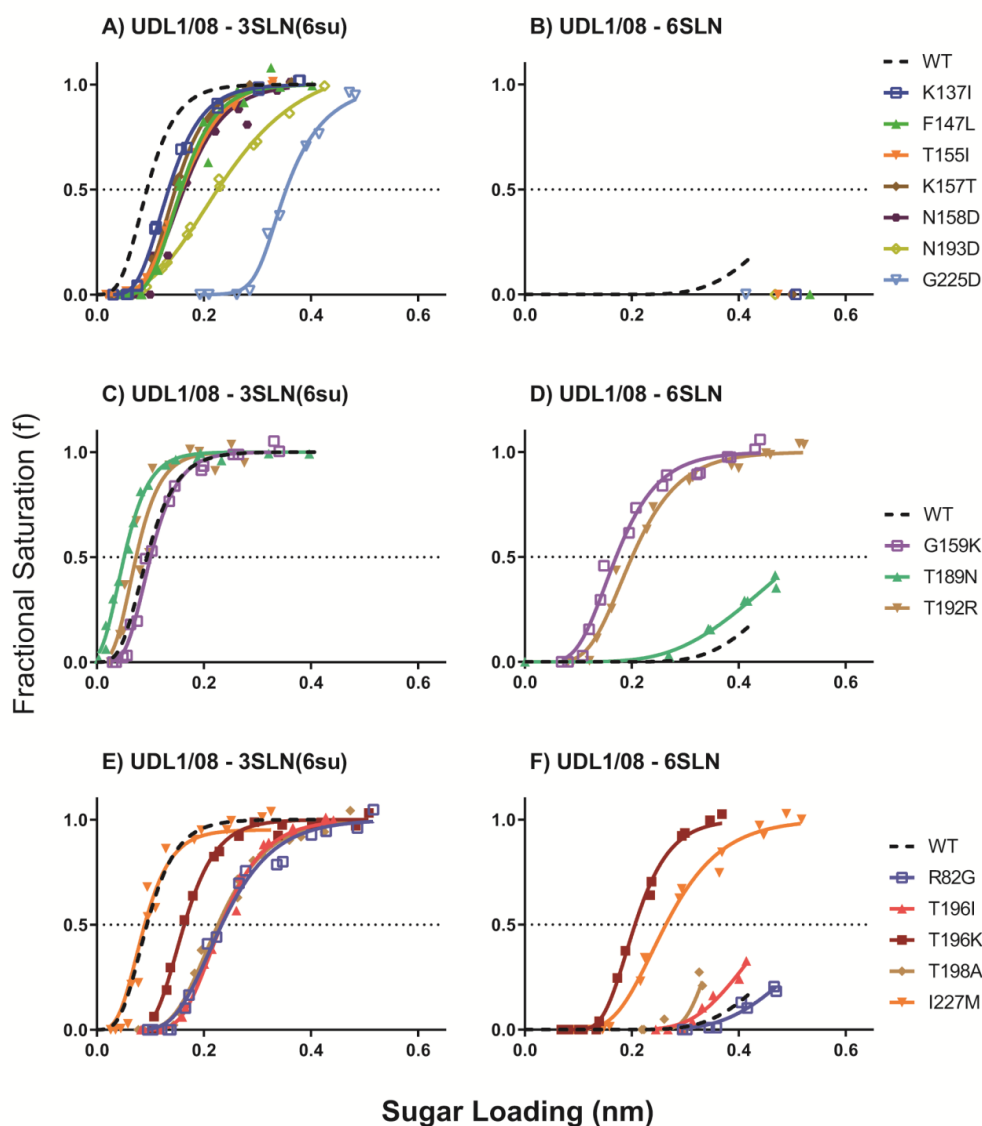

278  
279  
280  
281  
282  
283  
284  
285

**Figure 4. Receptor binding modulation by non-reciprocal mutations in the background of UDL1/08.** Biolayer interferometry was used to determine the receptor binding profiles of each mutant virus. Binding was measured to 3 receptor analogues,  $\alpha$ 2,6-sialyllactosamine (6SLN),  $\alpha$ 2,3-sialyllactosamine (3SLN) and Neu5Ac  $\alpha$ 2,3 Gal  $\beta$ 1-4(6-HSO<sub>3</sub>)GlcNAc (3SLN(6su)). No viruses had any detectable 3SLN binding. Dashed black lines show wild-type UDL1/08 binding. Panels indicate binding by mutants that show an avidity reduction (A,B), an increase in avidity (C,D) and changes in receptor binding preference (E,F). No mutants had any detectable binding to 3SLN.

286  
287  
288  
289  
290  
291

In general, amino acid replacements that increased positive charge in the HA head domain tended to cause an increase in receptor-binding avidity while the opposite was true for substitutions that increased negative charge. In Figure 5A, the impact of substitutions introduced to the UDL1/08 backbone on avidity for its preferred receptor, 3SLN(6su), is plotted by the change in net charge of the HA head domain. The proximity of the residues at which substitutions were introduced to the RBS is shown in Figure 5B.

## Genetic basis of H9N2 receptor-binding variability

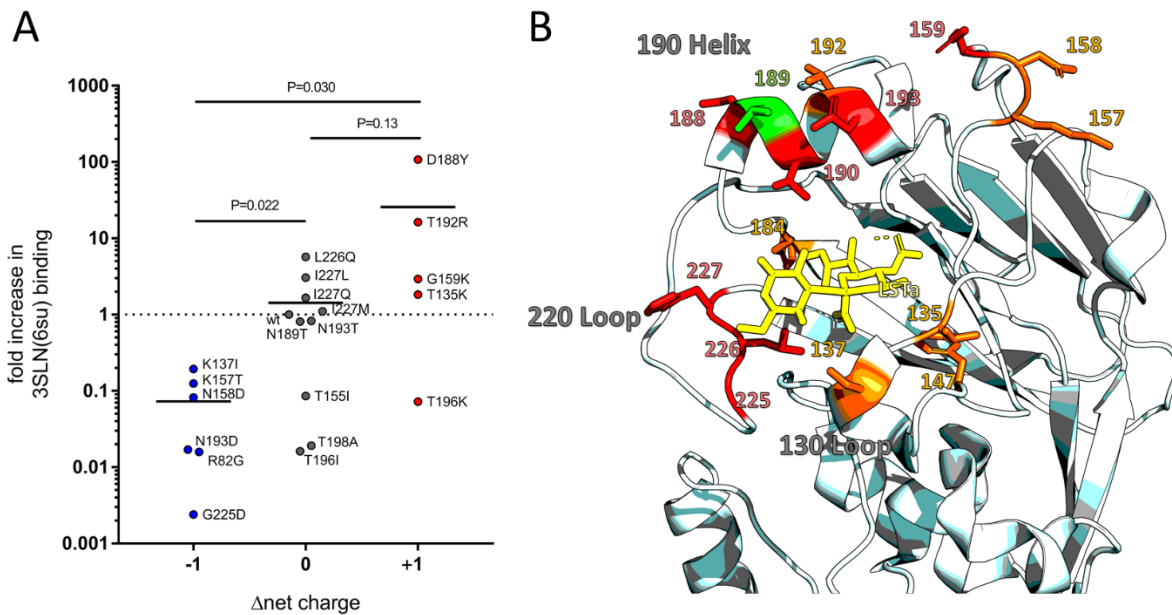

292

293 **Figure 5 - Mapping of residues tested for receptor binding changes and correlation between**  
 294 **charge and 3SLN(6su) binding.** A) The fold-increase in binding to 3SLN(6su) is plotted along with  
 295 the introduced change in net charge difference. Wild type UDL1/08 binding to 3SLN(6su) is set to 1  
 296 with relative binding calculated as described previously [21]. Annotated P values calculated using a  
 297 non-parametric Mann-Whitney U test – lines indicate mean fold increase. B) Residues which effect  
 298 receptor binding preference (i.e. effect binding to different analogues in different ways) shown in  
 299 red, residues that affect receptor binding avidity across analogues shown in orange. Residue that  
 300 when mutated have no effect on receptor binding shown in green. LSTa, shown in yellow, is an  
 301  $\alpha$ 2,3-linked (avian-like) receptor analogue. H3 HA numbering used throughout. Figure made using  
 302 structure PDBID:1JSH [41], made using PyMol [42].

303 To investigate variation in avidity among natural H9N2 viruses, we modelled variation in HI  
 304 titres for a dataset of large number of viruses covering all major H9 lineages. In addition to  
 305 measuring antigenic similarity of influenza viruses, HI titres are influenced by varying avidity. Viruses  
 306 that bind receptors on the surface of red blood cells used in the assay with higher avidity require  
 307 more antibodies to inhibit haemagglutination manifesting as a tendency towards lower HI titres  
 308 regardless of antigenic relationships to the antisera used, and vice-versa. To identify amino acid  
 309 variants correlating with such variation in titres, we adapted a model we previously developed to  
 310 explore antigenic variation in both human and avian influenza viruses, identifying several  
 311 substitutions predicted to cause antigenic variation and validating these using mutagenesis [25, 29].

312 Variation in HI titres resulting both from antigenic differences and from variation in virus  
 313 avidity was mapped to branches of the H9 HA phylogenetic tree as previously described [25]. To  
 314 explore the genetic basis of variation caused by differences in avidity, phylogenetic terms  
 315 representing branches leading to clades of viruses with systematically higher or lower titres were  
 316 replaced with terms representing amino acid identity in the test virus at each variable HA position  
 317 in turn. Under a forward selection procedure, terms representing positions 190, 196 and 198 were  
 318 selected (180, 186 and 188 in H9 numbering, respectively). Each of these positions are in the 190-  
 319 helix, proximal to the RBS. Position 190 has already been shown to play a role in receptor-binding  
 320 in this and other studies [18, 20], and we see the effect of 196 and 198 on receptor-binding  
 321 preference in this study (Figure 4E,F), further validating this modelling approach (Table 3).

## Genetic basis of H9N2 receptor-binding variability

| Residue (H3 no) | Residue (H9 no) | Distinct amino acid residues <sup>b</sup> | Number of HI titres | Effect on 3SLN(6su) binding |
|-----------------|-----------------|-------------------------------------------|---------------------|-----------------------------|
| 190             | 180             | A                                         | 1,145               |                             |
|                 |                 | T                                         | 309                 | 50x increase                |
|                 |                 | V                                         | 494                 | 1400x increase              |
| 196             | 186             | T                                         | 1,912               |                             |
|                 |                 | I                                         | 331                 | 41x decrease                |
|                 |                 | K                                         | 296                 | 7x decrease                 |
| 198             | 188             | T                                         | 1,913               |                             |
|                 |                 | A                                         | 351                 | 41x decrease                |

322 **Table 3. Amino acid residues predicted to explain variation in HI titres as a result differences in receptor-**  
 323 **binding avidity.** Effect on 3SLN(6su) binding is shown relative to most common amino acid in meta-analysis  
 324 dataset: 190A, 196T, and 198T.

### 325 *Sequence-based prediction of receptor-binding preference of H9N2 viruses*

326 Finally, we extrapolated the results of this study to predict the receptor-binding preferences  
 327 of circulating H9N2 viruses on the basis of amino acid identity at positions 190, 226 and 227. Viruses  
 328 were predicted as possessing one of three receptor-binding phenotypes (Figure 6): 1) a strong  
 329 preference for sulphated avian-like receptors, the canonical chicken-adapted H9N2 virus phenotype  
 330 (shown in green and represented by UDL1/08), 2) a receptor-binding phenotype more similar to  
 331 chicken-adapted H5Nx or H7N1 viruses and binds both sulphated and non-sulphated avian-like  
 332 receptors (shown in red and represented by Em/R66), or 3) an preference for the human-like  
 333 receptor with concurrent binding to avian receptors which we hypothesise may be an adaptation to  
 334 minor poultry (shown in blue and represented by HK/33982). Viruses were predicted to exhibit  
 335 preference for the sulphated avian-like receptor if at positions 190-226-227 they possessed either  
 336 A, T, or V at 190, L at 226 and either I, L, M, or Q at 227, or if they possessed the motifs A-Q-I, A-Q-  
 337 T, or I-Q-F. Viruses possessing either E-Q-L or E-Q-Q were predicted to bind both sulphated and non-  
 338 sulphated avian-like receptors. Viruses possessing A, D, T, or V at 190 and Q-Q at 226-227 were  
 339 predicted to show preference for the human-like receptor, as were viruses possessing the motif E-  
 340 L-Q. Predictions for motifs without direct evidence but made based on combinations of other motifs  
 341 results are shown in lighter shades to indicate reduced confidence (details in Materials and  
 342 Methods), while predicted receptor preference was considered unknown for viruses with  
 343 incomplete sequence information at positions 190, 226 and 227 or alternative motifs. The  
 344 substitutions at positions 196 and 198 that increased relative 6SLN binding were not included at this  
 345 stage as it is not known with which other substitutions must occur to elevate 6SLN binding above  
 346 binding for the avian receptor.

## Genetic basis of H9N2 receptor-binding variability

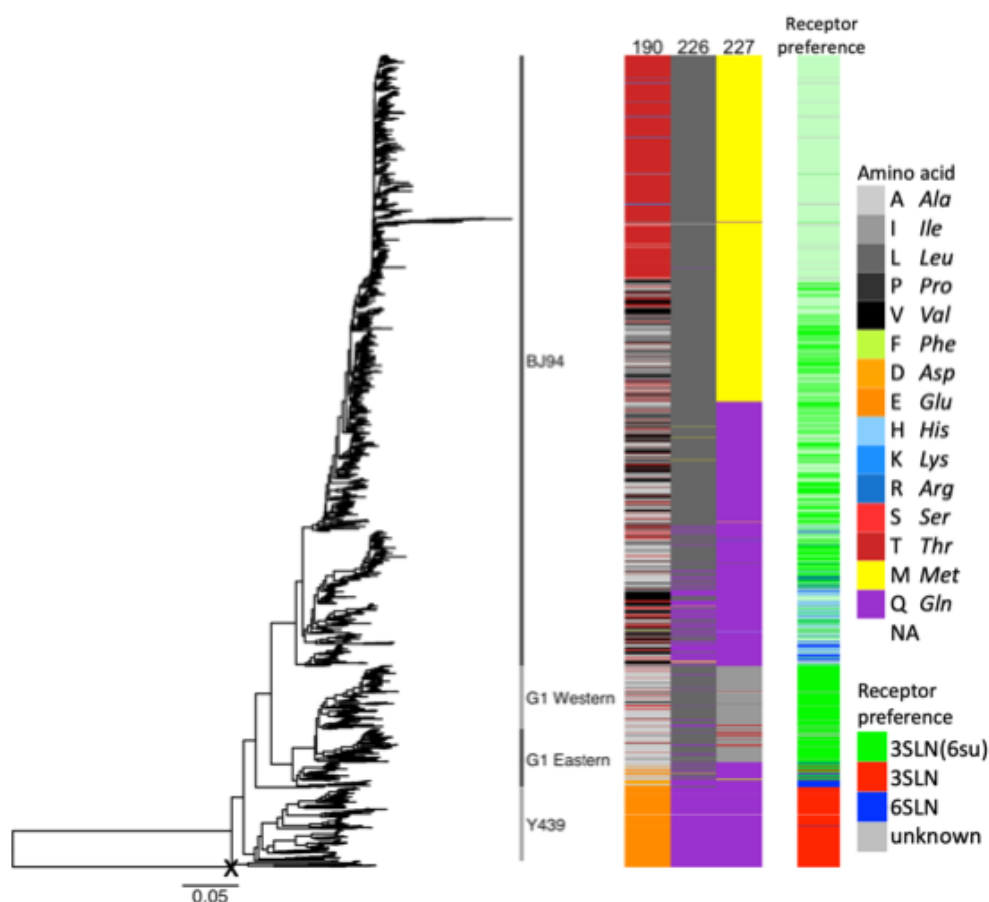

347

348 **Figure 6. Sequence variation and predicted receptor preference across H9N2 phylogeny.** HA  
 349 phylogeny for 2,440 H9N2 viruses generated using and rooted with a sequence from H9-like bat  
 350 influenza virus (starred). Amino acid identity at positions 190, 226 and 217 is shown by colour,  
 351 grouped by side-chain property, according to the legend. Predicted receptor preference for  $\alpha$ 2,6-  
 352 sialyllactosamine (6SLN),  $\alpha$ 2,3-sialyllactosamine (3SLN) and Neu5Ac  $\alpha$ 2,3 Gal  $\beta$ 1-4(6-HSO<sub>3</sub>)GlcNAc  
 353 (3SLN(6su)) is shown in blue, red and green respectively, with lighter shades indicating reduced  
 354 confidence. Predicted receptor preference is based on amino acid identity at positions 190, 226 and  
 355 227 based on extrapolation of the amino acid sequence of viruses tested using BLI and the results  
 356 of mutagenesis experiments.

357 Amino acid sequence at positions 190, 226, and 227 and the resulting prediction of receptor  
 358 preference is shown across a phylogeny constructed using all available H9N2 HA sequences in Figure  
 359 6. Almost all viruses in Y439-like lineage, prevalent in wild birds and poultry in Korea, as well as a  
 360 few viruses in the G1-Eastern sub-lineage are predicted to show an Em/R66-like preference for any  
 361 avian-like receptor. The vast majority of viruses in the chicken-adapted BJ94 and G1 lineages are  
 362 predicted to maintain a canonical H9N2 sulphated avian receptor preference. A significant number  
 363 of viruses belonging to the G1-Eastern sub-lineage, prevalent in minor poultry in China, are  
 364 predicted to show a preference for human-like receptors, as are a number of viruses interspersed  
 365 within a clade of viruses belonging to the BJ94 lineage.

## 366 Discussion

367 Receptor-binding is an important determinant of host specificity and modification of  
 368 receptor binding properties is often a critical step in cross-species virus transmission. In this study  
 369 we have comprehensively investigated residues in and around the receptor binding site of HA from  
 370 H9N2 viruses for their ability to influence receptor preference and avidity. We have shown that  
 371 different combinations of the residues 190, 226 and 227 account for much, but not all, of the

## Genetic basis of H9N2 receptor-binding variability

372 variability in H9N2 receptor binding between viruses representative of the major binding  
373 phenotypes. Furthermore, we described several other residues that have strong influences on H9N2  
374 receptor binding preference including positions 159, 188, 193, 196 and 198. We propose a model  
375 whereby residues in the influenza HA1 that don't directly coordinate receptor binding can play a  
376 delocalised avidity role through modulating the charge of the head domain with increases in positive  
377 charge giving a non-specific increase in avidity and vice versa. We hypothesise this effect may be  
378 exaggerated for H9N2 viruses where sulphated, sialylated glycans appear to be the preferred  
379 receptor owing to the greater amount of negative charge in these receptors (compared to non-  
380 sulphated, sialylated glycans). Finally, we have applied the results of this study to try and predict the  
381 receptor binding phenotypes of different circulating H9N2 viruses as a way of predicting strains that  
382 may have a heightened zoonotic potential.

383 Several of the residues identified in this study have been previously described as directly or  
384 indirectly affecting H9 receptor binding, including position 155, 190, 225, 226 and 227 [13, 17-20,  
385 30, 31]. In previous studies, generally only one or two of these residues are measured in isolation  
386 for their receptor binding effect or are tested in a non- or only semi-quantitative manner. Here we  
387 perform a comprehensive, quantitative analysis often testing changes at residues in multiple  
388 different virus backbones and in multiple combinations to investigate strain-specific and  
389 compensatory effects. For example, residue 226 has been shown several times in an older G1-  
390 Eastern lineage virus to increase binding to human-like receptors [17, 32], with a similar effect when  
391 we investigate a contemporary virus of the same lineage (i.e. HK/33982), however in a G1-Western  
392 backbone (i.e. UDL1/08) we find a completely different effect whereby there is a general avidity  
393 increase and an overall increase in 6SLN-binding when a L226Q substitution is incorporated. This  
394 highlights the importance of the overall context of receptor binding residues when looking at  
395 influenza receptor binding mutants.

396 In our previous study we predicted that one of the groups of substitutions that had the  
397 largest effect on immune escape in H9N2 viruses were substitutions that affect avidity, as has been  
398 predicted for human influenza viruses [25, 33, 34]. Here we test a wide variety of escape mutants  
399 that were previously shown to robustly modulate polyclonal antisera binding and show a large  
400 number of them also modulate receptor binding avidity. This suggests that many escape mutations  
401 that have a large influence on antigenicity may be exerting this effect through a receptor binding  
402 avidity effect as has been shown for human influenza viruses [33, 34]. We also performed an analysis  
403 of matched genetic and antigenic data for 330 H9N2 viruses, covering each of the major H9 lineages  
404 [25]. Using a modified version of a model used to identify antigenic determinants, we predicted that  
405 different residues at positions 190, 196 and 198 would explain variation in HI titres as a result of  
406 differing avidity, as they tended to be associated with lower or higher HI titres irrespective of  
407 antigenic relationships between the viruses and antisera being compared. Each of these three  
408 positions are confirmed in this study to play an important role in regulation of receptor-binding  
409 avidity. In addition to the important role for 190 in receptor preference, the substitutions T196I,  
410 T196K and T198A all showed relative increases in human-like receptor binding. These results further  
411 demonstrate there is a strong case for using integrated modelling approaches to reanalyse large  
412 data sets and predict residues that affect receptor binding and antigenic phenotypes.

413 We present evidence suggesting that residues in the influenza HA1 that don't directly  
414 coordinate receptor binding play a delocalised avidity role through modulating the charge of the  
415 head domain. For mutations introduced in the UDL1/08 background and measured in binding to its  
416 preferred receptor, 3SLN(6su), we found a significant trend in avidity change between substitutions  
417 that introduced a negative charge and those that introduced a positive charge. In general,  
418 substitutions observed to increase avidity tended to increase the net positive charge around the

## Genetic basis of H9N2 receptor-binding variability

419 RBS (e.g. T135K, G159K, T192R, D188Y, Em/R66 E190A, Em/R66 Q226L/E190A) whilst avidity  
420 decreasing mutants usually decreased the net positive charge around the RBS (e.g. R82G, K137I,  
421 K157T, N158D, N193D, G225D, HK/33982 Y188D, HK/33982 H184E). This effect is likely due to non-  
422 specific charge interactions with the negatively charged sialic acid and we hypothesise may be more  
423 pronounced for H9N2 viruses as the negative charge of sulphated, sialylated glycans, which appear  
424 to be their preferred receptor, is greater due to the negatively charged sulphate group.

425 An important contribution of this study is the identification of several substitutions that, in  
426 one or more of our virus backbones, resulted in viruses with increased or *de novo* human-like 6SLN  
427 binding. These residues will be useful for future surveillance efforts to identify newly sequenced  
428 viruses with elevated zoonotic potential. These particular substitutions include the previously well  
429 characterised Q226L substitution in HK/33982 or Em/R66-like backbones (but not the contemporary  
430 G1-Western UDL1/08-like backbone) as well as the newly characterised R82G, T135K, G159K, T196I,  
431 T196K, T198A, I227M and I227Q substitutions in the UDL1/08-like backbone. Several of these  
432 mutations are already commonly found in the field, further suggesting that H9N2 virus variants  
433 naturally circulate with a likely heightened zoonotic potential.

434 In conclusion, we have quantified the impact of single and multiple amino acid substitutions  
435 on receptor binding phenotypes in the context of several H9N2 viruses with varying receptor binding  
436 preferences, identifying seven novel mutations that increase binding to the human-like receptor.  
437 We further highlight the importance of mutations that impact receptor binding avidity. Avidity  
438 modulation has a dramatic impact on antigenicity and an equally important role in receptor binding  
439 phenotype, thus viruses that gain avidity enhancing mutations may present multiple challenges in  
440 that both vaccine efficacy may be compromised, and zoonotic potential may be increased  
441 concurrently. As well as helping better understand the molecular basis of avian influenza receptor  
442 binding, the results generated here will help future surveillance efforts to identify viruses which may  
443 potentially have an augmented zoonotic potential and/or greater vaccine escape potential.

## 444 Materials and Methods

### 445 *Ethics statement*

446 Use of embryonated eggs in this study was carried out in strict accordance with European  
447 and United Kingdom Home Office regulations and the Animals (Scientific Procedures) Act 1986  
448 Amendment Regulations, 2012. These studies were carried out under the United Kingdom Home  
449 Office approved project license numbers 30/2683 and 30/2952.

### 450 *Cell lines and eggs*

451 HEK 293Ts and MDCKs were maintained in Dulbecco's modified Eagle medium (DMEM),  
452 supplemented with 10% foetal calf serum, 37°C, 5% CO<sub>2</sub>. Viruses were propagated in 10-day-old  
453 embryonated eggs; allantoic fluid was harvest 48 hours post-inoculation.

### 454 *Viruses*

455 Throughout this study recombinant viruses, generated by standard 8 plasmid influenza  
456 reverse genetics were used [35]. All viruses contained the named HA gene (whether wild type or  
457 mutant), the NA of A/chicken/Pakistan/UDL-01/2008 (UDL1/08) and the remaining genes from  
458 A/Puerto Rico/8/1934 (PR8), allowing for high viral titres from eggs. Mutant HA plasmids were  
459 generated by site directed mutagenesis. Viruses were attempted to be rescued a minimum of three  
460 independent times and left for 7 days post-co-culture before being determined to be un-rescuable.

## Genetic basis of H9N2 receptor-binding variability

### 461 *Virus sequencing*

462 Viruses were sequenced to confirm no reversions or additional substitutions had occurred  
463 upon production and propagation. The HA1 region of HA was sequenced for each virus as previously  
464 described [36].

### 465 *Virus purification*

466 Low speed centrifugation was initially used to remove large debris from virus containing egg  
467 allantoic fluid. Virus particles were next pelleted by ultracentrifugation at 27,000rpm for 2 hours.  
468 Virus pellets were subsequently homogenised by glass homogeniser, resuspended and purified with  
469 a 30-60% sucrose gradient. The visible band containing virus was then isolated, diluted into PBS and  
470 centrifuged for another 2 hours at 27,000rpm. The final virus pellet was then resuspended in PBS,  
471 0.01% azide. Concentration of purified viruses was determined using a nucleoprotein ELISA as  
472 described previously [37].

### 473 *Bi-layer interferometry*

474 Purified virus binding to different sialylated receptor analogues was tested using an Octet  
475 RED bio-layer interferometer (Pall ForteBio) as described previously [21]. Receptor analogues  
476 contained 30kDa polyacrylamide backbones conjugated to 20 mol % trisaccharides and 5 mol %  
477 biotin (Lectinity Holdings). The three analogues used in this study were  $\alpha$ 2,6-sialyllactosamine  
478 (6SLN),  $\alpha$ -2,3-sialyllactosamine (3SLN) and Neu5Ac  $\alpha$ -2,3Gal $\beta$ 1-4(6-HSO3)GlcNAc(3SLN(6su)).  
479 Sialoglycopolyemers were bound onto streptavidin coated biosensors (Pall ForteBio) at ranges of  
480 concentrations from 0.01-0.55 $\mu$ g/ml in 10mM HEPES, pH 7.4, 150mM NaCl, 3mM EDTA, 0.005%  
481 Tween-20 (HBS-EP). Virus was diluted to a concentration of 100pM in HBS-EP, 10 $\mu$ M oseltamavir  
482 carboxylate (Roche), 10 $\mu$ M zanamivir (GSK). Virus association to the bound sialoglycopolymers was  
483 measured at 20°C for 30 minutes. Virus binding curves were normalised to fractional saturation and  
484 plotted as a function of sugar loading. Relative dissociation constants were calculated as described  
485 previously [21, 38].

### 486 *Modelling of potential receptor binding residues*

487 To identify amino acid positions where substitutions correlated with differences in receptor-  
488 binding avidity apparent in HI titres, a modelling approach previously used to identify substitutions  
489 causing antigenic differences among influenza viruses was adapted [25, 29, 39, 40]. Following the  
490 methodology described in the aforementioned studies, branches of the HA phylogenetic tree  
491 correlated with variation in HI titres when the branch 1) separated test virus and antisera, 2)  
492 descended the test virus, or 3) descended the virus used to generate antisera. These phylogenetic  
493 terms are interpreted as being associated with changes in 1) antigenicity, 2) receptor-binding  
494 avidity, and 3) immunogenicity, respectively. Internal branches of the phylogeny leading to clades  
495 of two or more viruses associated with systematically higher or lower titres (numbered 2 in previous  
496 sentences) and containing at least one virus also used as an antisera strain were removed,  
497 effectively dropping any terms from the model that explained variation in HI associated with  
498 differences in virus avidity. In their place, terms representing amino acid identity in the assayed virus  
499 at each variable HA position were tested. At each position, these terms allowed for titres to vary  
500 according to which amino acid residue the virus possessed to account for potential differences in  
501 contributions to avidity. These position-specific terms were added to the model under a forward  
502 selection procedure until the addition of further terms ceased to improve the model, as assessed  
503 by likelihood ratio test ( $p < 0.05$ ) with a Holm-Bonferroni correction for multiple testing. At selected  
504 positions, effect sizes were estimated for each alternative amino acid relative to the amino acid  
505 found most commonly in the dataset.

## Genetic basis of H9N2 receptor-binding variability

### 506 *Prediction of receptor binding profiles from sequence*

507 All available HA sequences from H9 viruses were downloaded from GIASID. A phylogenetic  
508 tree was generated from aligned nucleotide sequences using MEGA. Receptor-binding profiles were  
509 predicted across the phylogeny according to amino acid identify at positions 190, 226, and 227 on  
510 the basis of the BLI results derived during this study. Viruses were predicted as possessing either: 1)  
511 a strong preference for sulphated avian-like receptors, 2) a receptor binding phenotype more similar  
512 to chicken-adapted H5Nx or H7N1 viruses that bind both sulphated and non-sulphated avian-like  
513 receptors or 3) a preference for the human-like receptor with concurrent binding to avian receptors.  
514 Viruses were predicted to exhibit preference for the sulphated avian-like receptor if at positions  
515 190-226-227 they possessed the motifs A-L-I, A-L-L, A-L-M, A-L-Q, A-Q-I, A-Q-T, I-Q-F, T-L-I, V-L-I (or  
516 with reduced confidence T-L-L, T-L-M, T-L-Q, V-L-L, V-L-M, or V-L-Q), for any avian-like receptor if  
517 they possessed the motifs E-Q-L or E-Q-Q, and for the human-like receptor if they possessed A-Q-Q,  
518 D-Q-Q, E-L-Q (or with reduced confidence T-Q-Q or V-Q-Q). Predictions made with reduced  
519 confidence indicate that we have not tested the exact combination of amino acids but that the  
520 prediction is consistent with other combinations barring unforeseen interactions between sites. For  
521 viruses with incomplete sequence information at positions 190, 226 and 227 or alternative motifs,  
522 no prediction was made.

### 523 Funding statement

524 This research was supported by the Biotechnology and Biological Sciences Research Council  
525 under grants BBS/E/00001759 (TPP), BBS/E/I/00001708 (JES), BB/L018853/1 (MI, JES),  
526 BBS/E/I/00007031 (MI), BBS/E/I/00007035 (MI), BBS/E/I/00007038 (MI), BBS/E/I/00007039 (MI),  
527 BB/L004828/1 (RR), BB/P004202/1 (RR) and BB/R012679/1 (MI, RR) and the Medical Research  
528 Council under grant numbers MR/J50032X/1 (1097258) and MR/R024758/1 (WTH). The funders had  
529 no role in study design, data collection and analysis, decision to publish or preparation of the  
530 manuscript. The Francis Crick Institute receives its core funding from Cancer Research UK, the UK  
531 Medical Research Council, and the Wellcome Trust.

### 532 Competing Interests

533 The authors state they have no conflict of interest.

### 534 Acknowledgements

535 The authors would like to thank Dr Stephen Martin of The Francis Crick institute for use of  
536 his software for analysing the bio-layer interferometry results and Dr Jürgen Stech of the Friedrich  
537 Loeffler Institute for the haemagglutinin reverse genetics plasmid of A/chicken/Emirates/R66/2002  
538 (H9N2).

### 539 Author contributions

540 Conceptualisation - TP, WH. Data curation, Formal analysis, funding acquisition – RR & MI  
541 Investigation - TP, JES & WH. Methodology, Resources, Software- WH & RR Supervision – WB, RR &  
542 MI. Writing original draft – TP, JES & WH. Writing – review and editing – All

### 543 References

544 1. Thuy DM, Peacock TP, Bich VT, Fabrizio T, Hoang DN, Tho ND, et al. Prevalence and diversity  
545 of H9N2 avian influenza in chickens of Northern Vietnam, 2014. *Infect Genet Evol.* 2016;44:530-40.  
546 doi: 10.1016/j.meegid.2016.06.038. PubMed PMID: 27340015.



## Genetic basis of H9N2 receptor-binding variability

- 547 2. Negovetich NJ, Feeroz MM, Jones-Engel L, Walker D, Alam SM, Hasan K, et al. Live bird  
548 markets of Bangladesh: H9N2 viruses and the near absence of highly pathogenic H5N1 influenza.  
549 PLoS One. 2011;6(4):e19311. doi: 10.1371/journal.pone.0019311. PubMed PMID: 21541296;  
550 PubMed Central PMCID: PMC3082571.
- 551 3. Chen LJ, Lin XD, Guo WP, Tian JH, Wang W, Ying XH, et al. Diversity and evolution of avian  
552 influenza viruses in live poultry markets, free-range poultry and wild wetland birds in China. J Gen  
553 Virol. 2016;97(4):844-54. Epub 2016/01/14. doi: 10.1099/jgv.0.000399. PubMed PMID: 26758561.
- 554 4. Peacock THP, James J, Sealy JE, Iqbal M. A Global Perspective on H9N2 Avian Influenza Virus.  
555 Viruses. 2019;11(7). Epub 2019/07/10. doi: 10.3390/v11070620. PubMed PMID: 31284485;  
556 PubMed Central PMCID: PMCPMC6669617.
- 557 5. Peiris M, Yuen KY, Leung CW, Chan KH, Ip PL, Lai RW, et al. Human infection with influenza  
558 H9N2. Lancet. 1999;354(9182):916-7. PubMed PMID: 10489954.
- 559 6. Guo Y, Li J, Cheng X. [Discovery of men infected by avian influenza A (H9N2) virus]. Zhonghua  
560 shi yan he lin chuang bing du xue za zhi = Zhonghua shiyan he linchuang bingduxue zazhi = Chinese  
561 journal of experimental and clinical virology. 1999;13(2):105-8. PubMed PMID: 12569771.
- 562 7. International Centre for Diarrhoeal Disease Research (ICDDR). Outbreak of mild respiratory  
563 disease caused by H5N1 and H9N2 infections among young children in Dhaka, Bangladesh. Health  
564 and Science Bulletin: 2011.
- 565 8. World Health Organisation. Influenza at the human-animal interface, Summary and  
566 assessment, 3 March 2015. [www.who.int](http://www.who.int): 2015 3 March 2015. Report No.
- 567 9. Ali M, Yaqub T, Mukhtar N, Imran M, Ghafoor A, Shahid MF, et al. Avian Influenza A(H9N2)  
568 Virus in Poultry Worker, Pakistan, 2015. Emerg Infect Dis. 2019;25(1):136-9. Epub 2018/12/19. doi:  
569 10.3201/eid2501.180618. PubMed PMID: 30561309.
- 570 10. Influenza at the human-animal interface, Summary and assessment, 10 April to 10 May 2019.  
571 Report. Geneva, Switzerland: World Health Organisation, 2019.
- 572 11. World Health Organisation. Influenza at the human-animal interface, Summary and  
573 assessment, from 21 January to 28 February 2020. [www.who.int](http://www.who.int): 2020 28 February 2020. Report  
574 No.
- 575 12. World Health Organisation. Influenza at the human-animal interface, Summary and  
576 assessment, from 28 September to 25 November 2019. [www.who.int](http://www.who.int): 2019 25 November 2019.  
577 Report No.
- 578 13. Li X, Shi J, Guo J, Deng G, Zhang Q, Wang J, et al. Genetics, receptor binding property, and  
579 transmissibility in mammals of naturally isolated H9N2 Avian Influenza viruses. PLoS Pathog.  
580 2014;10(11):e1004508. doi: 10.1371/journal.ppat.1004508. PubMed PMID: 25411973; PubMed  
581 Central PMCID: PMC4239090.
- 582 14. Uyeki TM, Chong YH, Katz JM, Lim W, Ho YY, Wang SS, et al. Lack of evidence for human-to-  
583 human transmission of avian influenza A (H9N2) viruses in Hong Kong, China 1999. Emerg Infect Dis.  
584 2002;8(2):154-9. doi: 10.3201/eid0802.010148. PubMed PMID: 11897066; PubMed Central PMCID:  
585 PMC2732440.
- 586 15. Rogers GN, Paulson JC. Receptor determinants of human and animal influenza virus isolates:  
587 differences in receptor specificity of the H3 hemagglutinin based on species of origin. Virology.  
588 1983;127(2):361-73. Epub 1983/06/01. doi: 10.1016/0042-6822(83)90150-2. PubMed PMID:  
589 6868370.
- 590 16. Pillai SP, Lee CW. Species and age related differences in the type and distribution of influenza  
591 virus receptors in different tissues of chickens, ducks and turkeys. Virol J. 2010;7:5. Epub  
592 2010/01/14. doi: 10.1186/1743-422X-7-5. PubMed PMID: 20067630; PubMed Central PMCID:  
593 PMCPMC2821308.

## Genetic basis of H9N2 receptor-binding variability

- 594 17. Wan H, Perez DR. Amino acid 226 in the hemagglutinin of H9N2 influenza viruses determines  
595 cell tropism and replication in human airway epithelial cells. *J Virol.* 2007;81(10):5181-91. doi:  
596 10.1128/JVI.02827-06. PubMed PMID: 17344280; PubMed Central PMCID: PMC1900221.
- 597 18. Teng Q, Xu D, Shen W, Liu Q, Rong G, Li X, et al. A Single Mutation at Position 190 in  
598 Hemagglutinin Enhances Binding Affinity for Human Type Sialic Acid Receptor and Replication of  
599 H9N2 Avian Influenza Virus in Mice. *J Virol.* 2016. doi: 10.1128/JVI.01141-16. PubMed PMID:  
600 27558420.
- 601 19. Sang X, Wang A, Ding J, Kong H, Gao X, Li L, et al. Adaptation of H9N2 AIV in guinea pigs  
602 enables efficient transmission by direct contact and inefficient transmission by respiratory droplets.  
603 *Sci Rep.* 2015;5:15928. doi: 10.1038/srep15928. PubMed PMID: 26552719.
- 604 20. Sealy JE, Yaqub T, Peacock TP, Chang P, Ermetal B, Clements A, et al. Association of Increased  
605 Receptor-Binding Avidity of Influenza A(H9N2) Viruses with Escape from Antibody-Based Immunity  
606 and Enhanced Zoonotic Potential. *Emerg Infect Dis.* 2018;25(1):63-72. Epub 2018/12/19. doi:  
607 10.3201/eid2501.180616. PubMed PMID: 30561311.
- 608 21. Peacock TP, Benton DJ, Sadeyen JR, Chang P, Sealy JE, Bryant JE, et al. Variability in H9N2  
609 haemagglutinin receptor-binding preference and the pH of fusion. *Emerg Microbes Infect.*  
610 2017;6(3):e11. doi: 10.1038/emi.2016.139. PubMed PMID: 28325922.
- 611 22. Gambaryan AS, Tuzikov AB, Pazynina GV, Desheva JA, Bovin NV, Matrosovich MN, et al. 6-  
612 sulfo sialyl Lewis X is the common receptor determinant recognized by H5, H6, H7 and H9 influenza  
613 viruses of terrestrial poultry. *Virology.* 2008;5:85. doi: 10.1186/1743-422X-5-85. PubMed PMID:  
614 18652681; PubMed Central PMCID: PMC2515299.
- 615 23. Xiong X, Tuzikov A, Coombs PJ, Martin SR, Walker PA, Gamblin SJ, et al. Recognition of  
616 sulphated and fucosylated receptor sialosides by A/Vietnam/1194/2004 (H5N1) influenza virus.  
617 *Virus research.* 2013;178(1):12-4. doi: 10.1016/j.virusres.2013.08.007. PubMed PMID: 24036174.
- 618 24. Xiong X, Martin SR, Haire LF, Wharton SA, Daniels RS, Bennett MS, et al. Receptor binding by  
619 an H7N9 influenza virus from humans. *Nature.* 2013;499(7459):496-9. doi: 10.1038/nature12372.  
620 PubMed PMID: 23787694.
- 621 25. Peacock TP, Harvey WT, Sadeyen JR, Reeve R, Iqbal M. The molecular basis of antigenic  
622 variation among A(H9N2) avian influenza viruses. *Emerg Microbes Infect.* 2018;7(1):176. Epub  
623 2018/11/08. doi: 10.1038/s41426-018-0178-y. PubMed PMID: 30401826; PubMed Central PMCID:  
624 PMC6220119.
- 625 26. Gambaryan AS, Matrosovich TY, Philipp J, Munster VJ, Fouchier RA, Cattoli G, et al. Receptor-  
626 binding profiles of H7 subtype influenza viruses in different host species. *J Virol.* 2012;86(8):4370-9.  
627 doi: 10.1128/JVI.06959-11. PubMed PMID: 22345462; PubMed Central PMCID: PMC3318648.
- 628 27. Gambaryan A, Tuzikov A, Pazynina G, Bovin N, Balish A, Klimov A. Evolution of the receptor  
629 binding phenotype of influenza A (H5) viruses. *Virology.* 2006;344(2):432-8. Epub 2005/10/18. doi:  
630 10.1016/j.virol.2005.08.035. PubMed PMID: 16226289.
- 631 28. Peacock TP, Benton DJ, James J, Sadeyen JR, Chang P, Sealy JE, et al. Immune escape variants  
632 of H9N2 influenza viruses containing deletions at the haemagglutinin receptor binding site retain  
633 fitness in vivo and display enhanced zoonotic characteristics. *J Virol.* 2017. doi: 10.1128/JVI.00218-  
634 17. PubMed PMID: 28468875.
- 635 29. Harvey WT, Benton DJ, Gregory V, Hall JP, Daniels RS, Bedford T, et al. Identification of Low-  
636 and High-Impact Hemagglutinin Amino Acid Substitutions That Drive Antigenic Drift of Influenza  
637 A(H1N1) Viruses. *PLoS Pathog.* 2016;12(4):e1005526. doi: 10.1371/journal.ppat.1005526. PubMed  
638 PMID: 27057693; PubMed Central PMCID: PMC4825936.
- 639 30. Mancera Gracia JC, Van den Hoecke S, Saelens X, Van Reeth K. Effect of serial pig passages  
640 on the adaptation of an avian H9N2 influenza virus to swine. *PLoS One.* 2017;12(4):e0175267. Epub  
641 2017/04/07. doi: 10.1371/journal.pone.0175267. PubMed PMID: 28384328; PubMed Central  
642 PMCID: PMC5383288.

## Genetic basis of H9N2 receptor-binding variability

- 643 31. Kaverin NV, Rudneva IA, Ilyushina NA, Lipatov AS, Krauss S, Webster RG. Structural  
644 differences among hemagglutinins of influenza A virus subtypes are reflected in their antigenic  
645 architecture: analysis of H9 escape mutants. *J Virol.* 2004;78(1):240-9. PubMed PMID: 14671105;  
646 PubMed Central PMCID: PMC303415.
- 647 32. Obadan AO, Santos J, Ferreri L, Thompson AJ, Carnaccini S, Geiger G, et al. Flexibility in vitro  
648 of amino acid 226 in the receptor-binding site of an H9 subtype influenza A virus and its effect in  
649 vivo on virus replication, tropism, and transmission. *J Virol.* 2018. Epub 2018/12/21. doi:  
650 10.1128/JVI.02011-18. PubMed PMID: 30567980.
- 651 33. Hensley SE, Das SR, Bailey AL, Schmidt LM, Hickman HD, Jayaraman A, et al. Hemagglutinin  
652 receptor binding avidity drives influenza A virus antigenic drift. *Science.* 2009;326(5953):734-6. doi:  
653 10.1126/science.1178258. PubMed PMID: 19900932; PubMed Central PMCID: PMC2784927.
- 654 34. Li Y, Bostick DL, Sullivan CB, Myers JL, Griesemer SB, St George K, et al. Single Hemagglutinin  
655 Mutations that Alter Both Antigenicity and Receptor Binding Avidity Influence Influenza Virus  
656 Antigenic Clustering. *J Virol.* 2013;87(17):9904-10. doi: 10.1128/JVI.01023-13. PubMed PMID:  
657 23824816.
- 658 35. Hoffmann E, Neumann G, Kawaoka Y, Hobom G, Webster RG. A DNA transfection system for  
659 generation of influenza A virus from eight plasmids. *Proc Natl Acad Sci U S A.* 2000;97(11):6108-13.  
660 doi: 10.1073/pnas.100133697. PubMed PMID: 10801978; PubMed Central PMCID: PMC18566.
- 661 36. Peacock T, Reddy K, James J, Adamiak B, Barclay W, Shelton H, et al. Antigenic mapping of  
662 an H9N2 avian influenza virus reveals two discrete antigenic sites and a novel mechanism of immune  
663 escape. *Sci Rep.* 2016;6:18745. doi: 10.1038/srep18745. PubMed PMID: 26738561; PubMed Central  
664 PMCID: PMC4704030.
- 665 37. Lin YP, Xiong X, Wharton SA, Martin SR, Coombs PJ, Vachieri SG, et al. Evolution of the  
666 receptor binding properties of the influenza A(H3N2) hemagglutinin. *Proc Natl Acad Sci U S A.*  
667 2012;109(52):21474-9. doi: 10.1073/pnas.1218841110. PubMed PMID: 23236176; PubMed Central  
668 PMCID: PMC3535595.
- 669 38. Xiong X, Coombs PJ, Martin SR, Liu J, Xiao H, McCauley JW, et al. Receptor binding by a ferret-  
670 transmissible H5 avian influenza virus. *Nature.* 2013;497(7449):392-6. doi: 10.1038/nature12144.  
671 PubMed PMID: 23615615.
- 672 39. Reeve R, Borley DW, Maree FF, Upadhyaya S, Lukhwareni A, Esterhuysen JJ, et al. Tracking  
673 the Antigenic Evolution of Foot-and-Mouth Disease Virus. *PLoS One.* 2016;11(7):e0159360. doi:  
674 10.1371/journal.pone.0159360. PubMed PMID: 27448206; PubMed Central PMCID:  
675 PMC4957747.
- 676 40. Reeve R, Blignaut B, Esterhuysen JJ, Opperman P, Matthews L, Fry EE, et al. Sequence-based  
677 prediction for vaccine strain selection and identification of antigenic variability in foot-and-mouth  
678 disease virus. *PLoS Comput Biol.* 2010;6(12):e1001027. doi: 10.1371/journal.pcbi.1001027. PubMed  
679 PMID: 21151576; PubMed Central PMCID: PMC3000348.
- 680 41. Ha Y, Stevens DJ, Skehel JJ, Wiley DC. H5 avian and H9 swine influenza virus haemagglutinin  
681 structures: possible origin of influenza subtypes. *The EMBO journal.* 2002;21(5):865-75. doi:  
682 10.1093/emboj/21.5.865. PubMed PMID: 11867515; PubMed Central PMCID: PMC125880.
- 683 42. Schrodinger, LLC. The PyMOL Molecular Graphics System, Version 1.3r1. 2010.
- 684
